# Supplementary material for: Molecular mapping and functional validation of GLP-1R cholesterol binding sites in pancreatic beta cells
Source: eLife journal article supplement (doi:10.7554/elife.101011), 2024-09-17
Supplement: fig3-figsupp1-data1 [file elife-101011-fig3-figsupp1-data1-v1.pdf]

## PhotoClick Cholesterol

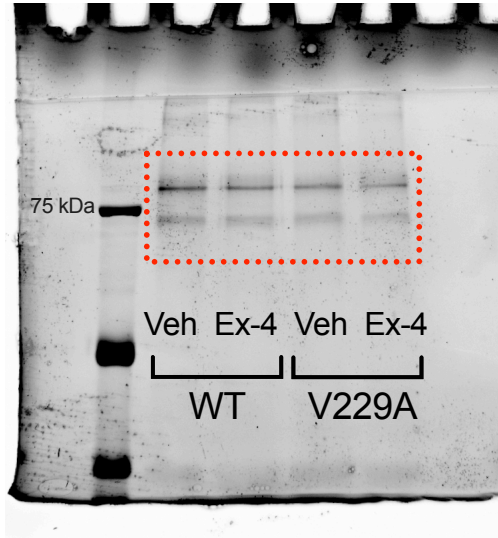

## SNAP/FLAG-hGLP-1R

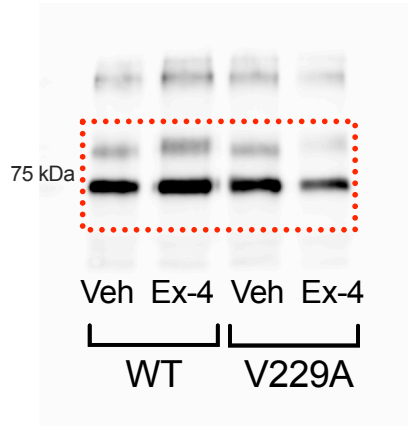

**Figure 3-figure supplement 1-Source data 1.** PDF file containing original western blots for Figure 3-figure supplement 1A, indicating the relevant bands and treatments.
